# Supplementary material for: Computer simulation of hypothetical hydrogen ordered structure of ice XIX
Source: Royal Society of Chemistry journal article supplement (doi:10.1039/d2cp01276f), 2022-01-01
Supplement: d2cp01276f1.pdf [file d2cp01276f1.pdf]

**Table 1** Simulated Raman scattering data ( $\text{cm}^{-1}$ ) of four candidate structures of ice XIX. The listed peaks with intensities ( $\text{\AA}^4$ ) are those for calculated phonons that are Raman mostly detectable. The experimentally obtained Raman peaks are listed in the first column.

| Exp. [3] | Struct. 1 | intensities | Struct. 2 | intensities | Struct. 3 | intensities | Struct. 4 | intensities |
|----------|-----------|-------------|-----------|-------------|-----------|-------------|-----------|-------------|
|          | 91        | 0.1711119   | 91        | 0.1342524   | 89        | 0.1809947   | 94        | 0.1474833   |
| 115      | 119       | 0.1019048   | 118       | 0.2227925   | 120       | 0.1049694   | 118       | 0.2973343   |
|          | 127       | 0.2331842   | 133       | 0.3218784   | 129       | 0.1397504   | 130       | 0.2139002   |
|          | 130       | 0.2539532   | 134       | 0.2928524   | 130       | 0.2284373   | 136       | 0.2748820   |
|          |           |             |           |             | 131       | 0.3698570   |           |             |
|          | 135       | 0.3701034   | 145       | 0.2545186   | 135       | 0.6255397   | 138       | 0.2961073   |
| 131      | 148       | 1.5021780   | 148       | 1.4752949   | 148       | 1.2161666   | 148       | 1.2782497   |
|          |           |             | 162       | 0.1756806   | 166       | 0.5556212   |           |             |
| 160      | 166       | 1.0640794   | 166       | 1.1514516   | 168       | 0.5169759   | 166       | 0.6553584   |
|          |           |             | 169       | 0.3667606   | 169       | 0.9146208   | 170       | 0.5677969   |
|          | 180       | 1.5732085   | 177       | 1.1067290   | 181       | 0.3001562   | 173       | 0.9505691   |
|          |           |             | 180       | 0.2760239   | 182       | 1.2880306   | 174       | 0.4671250   |
|          |           |             | 183       | 0.5514221   | 185       | 0.2487282   | 181       | 0.6846465   |
|          |           |             | 189       | 0.5431890   | 187       | 0.1832105   | 187       | 0.1375926   |
| 182      | 194       | 163837.07   | 193       | 3.6520939   | 192       | 4.3667210   | 193       | 4.3765791   |
|          |           |             | 209       | 0.2587864   | 207       | 0.2279065   | 208       | 0.3616320   |
|          |           |             | 229       | 0.2698043   | 229       | 0.3157040   | 231       | 0.2440198   |
|          |           |             | 237       | 0.1203552   | 239       | 0.1029373   | 237       | 0.2313913   |
| 303      | 269       | 159.11713   | 275       | 1.3274303   | 275       | 1.5948712   | 280       | 1.1819855   |
|          | 274       | 1.8454369   | 294       | 0.3906757   | 292       | 0.3261544   | 291       | 0.5765032   |
| 510      |           |             | 497       | 0.2351641   | 495       | 0.3375007   | 496       | 0.5428712   |
|          | 525       | 3.2298426   | 528       | 1.9280807   | 532       | 1.2190256   | 537       | 1.2725561   |
|          | 555       | 1.4328419   | 550       | 8.1352495   | 564       | 3.6469592   | 557       | 1.5075703   |
|          | 560       | 9.0826532   | 558       | 2.1535129   | 565       | 4.0847907   | 565       | 4.9705862   |
|          | 579       | 1.5755779   | 580       | 2.9985734   | 583       | 4.2349492   | 581       | 0.6503527   |
|          | 588       | 2.5359765   |           |             | 586       | 5.2198678   | 585       | 10.407531   |
|          | 604       | 12.415012   | 597       | 10.894359   | 601       | 13.090268   | 588       | 8.9270257   |
|          | 610       | 5.2720770   | 600       | 5.8215921   | 603       | 4.3048322   | 591       | 6.0173801   |
|          | 638       | 1.1694649   |           |             | 647       | 0.9899631   | 652       | 0.2341606   |
|          |           |             | 651       | 0.4129857   | 649       | 0.4967194   | 657       | 1.3014885   |
|          | 660       | 0.1804954   | 653       | 1.5374447   | 673       | 7.1102278   | 673       | 0.5993068   |
|          | 676       | 2.8230338   | 668       | 2.8239645   | 679       | 0.3571049   | 686       | 3.0735708   |
|          | 684       | 1.6042955   | 681       | 1.5339236   | 688       | 1.7643165   | 686       | 5.6466433   |
|          | 696       | 3.3732870   | 696       | 1.1215886   | 695       | 0.2639007   | 691       | 0.5020224   |
|          |           |             | 702       | 0.4092358   | 699       | 0.9697884   | 700       | 0.8266923   |
|          | 707       | 0.7879297   | 707       | 0.8653995   |           |             | 719       | 0.5789473   |
|          | 720       | 3.2074905   | 711       | 4.5322275   | 717       | 0.5234664   | 722       | 1.7246955   |

|      |      |           |      |           |      |           |      |           |
|------|------|-----------|------|-----------|------|-----------|------|-----------|
|      | 726  | 2.3294236 | 721  | 1.4859902 | 727  | 1.8692400 | 730  | 2.1132175 |
|      |      |           | 736  | 3.1512567 | 737  | 3.6098377 | 743  | 1.3036955 |
|      | 747  | 1.3466998 | 742  | 0.8694161 |      |           | 755  | 0.9539743 |
|      | 773  | 2.0907569 | 757  | 1.7560344 | 770  | 3.6495030 | 766  | 0.8143160 |
|      | 775  | 5.0106141 |      |           | 776  | 3.0305038 |      |           |
|      | 787  | 6.3136314 | 785  | 4.6698773 | 778  | 0.9738215 |      |           |
|      |      |           | 788  | 4.6838343 |      |           |      |           |
|      | 804  | 3.3133260 |      |           |      |           | 803  | 9.4193811 |
|      |      |           | 832  | 4.6306849 | 836  | 3.0702942 | 813  | 1.5699847 |
|      | 879  | 0.7365376 | 851  | 1.2213161 | 878  | 3.3508879 | 851  | 2.4352838 |
|      |      |           |      |           | 909  | 0.5599628 | 919  | 0.1659854 |
|      | 932  | 2.2623592 | 915  | 1.4779113 | 922  | 0.3513371 | 953  | 1.6722976 |
|      | 951  | 1.2038752 | 966  | 3.9250434 | 962  | 3.0323323 | 959  | 3.6241219 |
|      | 978  | 1.4285933 | 971  | 0.8196471 | 974  | 2.6153460 | 967  | 1.0671273 |
|      | 996  | 2.1958127 | 984  | 4.9321544 | 984  | 1.6769591 | 982  | 5.1212487 |
|      | 1027 | 0.9851965 | 1018 | 0.7256582 | 1024 | 0.4703492 | 1017 | 0.1092593 |
|      | 1617 | 10.399359 | 1623 | 7.9198791 | 1609 | 1.0321190 | 1606 | 1.2199889 |
|      | 1641 | 6.5130427 | 1639 | 11.871310 | 1631 | 3.3639327 | 1625 | 4.3549306 |
|      | 1647 | 8003.1270 | 1650 | 0.3158595 | 1637 | 4.8833906 | 1640 | 6.5870310 |
|      | 1654 | 2.1042735 | 1659 | 0.1609391 | 1644 | 1.7811537 | 1655 | 0.2539494 |
|      | 1655 | 3.2877297 |      |           |      |           |      |           |
|      |      |           | 1664 | 1.2609117 | 1665 | 9.3403868 | 1661 | 10.420090 |
|      | 1680 | 4.2716177 | 1672 | 4.9458998 | 1667 | 0.5981186 | 1670 | 0.6131287 |
|      |      |           | 1687 | 0.3044754 | 1686 | 0.6407600 |      |           |
|      | 1695 | 1.5623793 | 1695 | 3.2377123 | 1690 | 1.7482389 | 1699 | 0.1138995 |
|      |      |           |      |           | 1693 | 0.3209194 |      |           |
|      |      |           | 1701 | 0.3585601 | 1702 | 0.2881202 | 1701 | 3.3757403 |
|      | 3214 | 7.1988115 | 3209 | 5.1681058 | 3208 | 2.9072146 | 3206 | 17.929830 |
| 3206 | 3215 | 7352.6161 | 3210 | 6994.3137 | 3209 | 6921.2374 | 3208 | 7116.8694 |
|      |      |           | 3248 | 30.545747 | 3249 | 11.273783 | 3242 | 26.152243 |
|      | 3251 | 1218.0575 | 3249 | 1493.0470 | 3250 | 1515.5357 | 3244 | 1233.2802 |
|      | 3252 | 51.409099 | 3258 | 0.2240370 |      |           | 3250 | 0.1259293 |
|      | 3286 | 484.81981 | 3283 | 434.60602 | 3289 | 450.23201 | 3285 | 10.970670 |
|      | 3287 | 36.062549 |      |           | 3290 | 20.479532 | 3286 | 437.85790 |
|      |      |           |      |           | 3292 | 0.3958752 |      |           |
|      | 3301 | 587.72114 | 3303 | 491.07643 | 3293 | 345.01200 | 3296 | 476.82249 |
|      | 3302 | 54.594409 | 3304 | 202.30881 | 3295 | 421.49237 | 3297 | 280.25722 |
|      |      |           | 3330 | 254.49952 | 3327 | 470.99021 | 3330 | 241.23671 |
|      | 3327 | 471.56429 | 3331 | 225.37684 | 3329 | 84.549156 | 3331 | 245.74137 |
|      | 3328 | 78.860350 |      |           |      |           |      |           |
|      | 3361 | 29.802408 | 3361 | 151.34309 | 3362 | 649.08121 | 3361 | 550.44081 |
|      | 3364 | 669.95134 | 3364 | 492.51669 | 3364 | 58.567203 | 3365 | 108.47659 |
|      | 3387 | 173.74774 | 3389 | 305.44793 | 3387 | 441.10763 | 3389 | 705.68180 |

|  |      |           |      |           |      |           |      |           |
|--|------|-----------|------|-----------|------|-----------|------|-----------|
|  | 3397 | 382.90535 | 3401 | 272.49450 | 3402 | 14.463054 | 3401 | 121.94425 |
|  | 3407 | 80.961916 | 3403 | 554.49768 | 3408 | 164.58592 | 3409 | 166.24546 |
|  | 3410 | 156.44227 | 3411 | 29.457424 | 3410 | 577.22156 |      |           |
|  | 3422 | 479.18166 |      |           |      |           | 3418 | 110.78688 |
|  | 3436 | 122.82502 | 3428 | 149.85105 | 3429 | 293.35959 | 3421 | 600.09284 |
|  | 3437 | 1.9796247 | 3434 | 285.71590 | 3430 | 36.680399 | 3437 | 3.8247831 |
|  | 3462 | 150.40342 | 3466 | 227.54016 | 3459 | 165.19095 | 3462 | 251.47520 |
|  | 3470 | 436.36889 | 3474 | 345.43436 | 3469 | 415.40090 | 3473 | 338.11313 |
